# Supplementary material for: Adding Cognitive Remediation to Employment Support Services: A Randomized Controlled Trial
Source: Atypon-hosted journal article supplement (doi:10.1176/appi.ps.202100249), 2022-09-06
Supplement: appi.ps.202100249.ds001.pdf [file appi.ps.202100249.ds001.pdf]

### CONSORT Flow Diagram

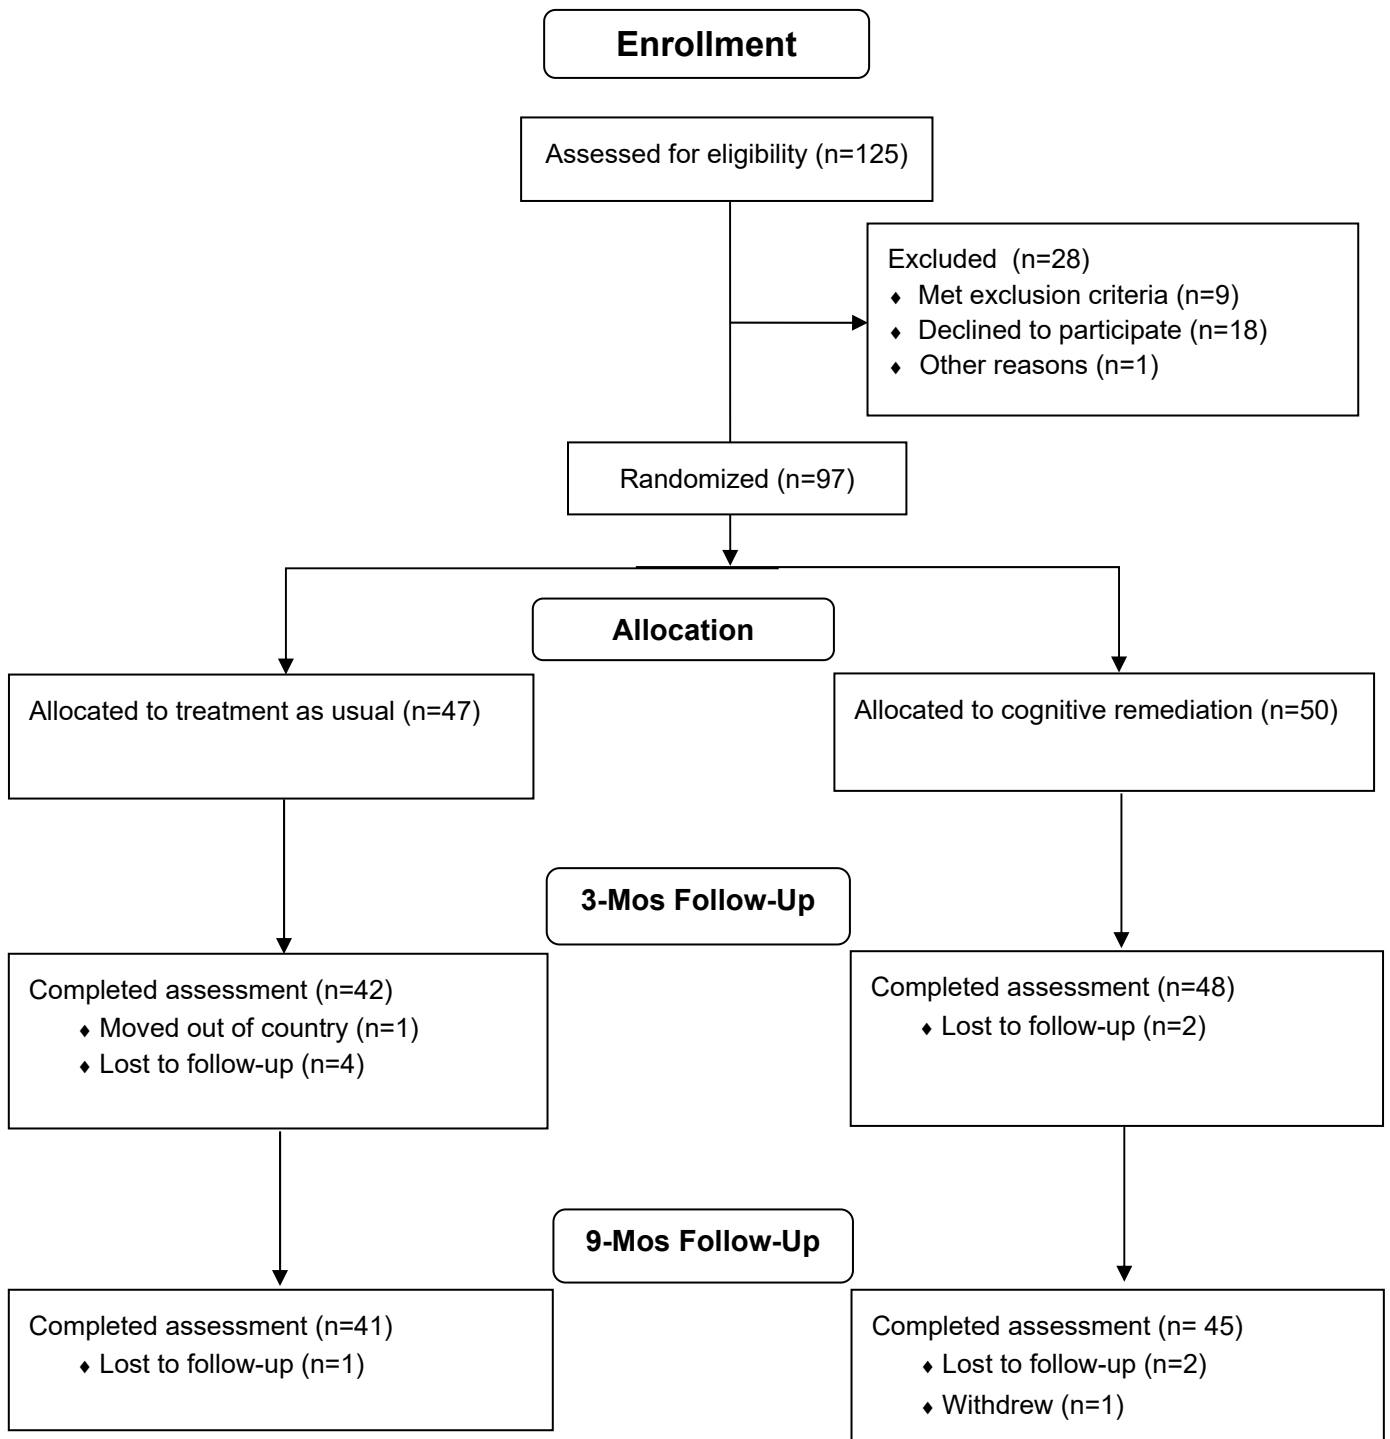

Supplemental Table. Employment Outcomes

|                                                    |          | <b>CRT + IPS</b> | <b>IPS</b> |
|----------------------------------------------------|----------|------------------|------------|
| <b>Employment Status<br/>(Percentage employed)</b> | Baseline | 19               | 13         |
|                                                    | 3-month  | 52               | 28         |
|                                                    | 9-month  | 60               | 34         |
| <b>Hours worked per week</b>                       | Baseline | 3.8              | 1.7        |
|                                                    | 3-month  | 12.5             | 7.2        |
|                                                    | 9-month  | 20.1             | 10.1       |
| <b>Earnings per week (\$)</b>                      | Baseline | 45               | 25         |
|                                                    | 3-month  | 212              | 105        |
|                                                    | 9-month  | 332              | 143        |
